# Supplementary material for: AP‐3 vesicle uncoating occurs after HOPS‐dependent vacuole tethering
Source: PubMed Central journal article supplement (PMC7560216; doi:10.15252/embj.2020105117), 2020-08-25
Supplement: EMBJ-39-e105117-s001.pdf [file EMBJ-39-e105117-s001.pdf]

# **AP-3 vesicle uncoating occurs after HOPS-dependent vacuole tethering**

Jannis Schoppe<sup>1</sup>, Muriel Mari<sup>2</sup>, Erdal Yavavli<sup>1</sup>, Kathrin Auffarth<sup>1</sup>, Margarita Cabrera<sup>3</sup>, Stefan Walter<sup>4</sup>, Florian Fröhlich<sup>4,5</sup>, and Christian Ungermann<sup>1,4,6</sup>

## **Appendix**

**Table of Contents**

**Appendix Legend - Page 2**

**Appendix Figure S1 - Page 3**

**Appendix Figure S2 - Page 4**

**Appendix Table S1 - Page 5**

## Appendix Legends

**Appendix Figure S1:** Effect of Vps41 S-A mutation on AP-3 localization to mitochondria. Cells expressing either wild-type Vps41-GFP-Fis1 or the Vps41 S-A variant and Apl6-mCherry were grown at 30°C in YPG and kept in logarithmic phase. Just prior to imaging, the mitochondrial DNA was stained with DAPI as described in the methods. Localization of Apl6 and Vps41 was analysed by fluorescence microscopy. DIC image is shown in first column. Scale bar, 5 µm. The inset shows the indicated magnification. Scale bar in inset, 2 µm.

**Appendix Figure S2:** Quantification of AP-3 puncta at the mitochondrial surface. **(A)** Tethering of AP-3 vesicles to the mitochondrial surface in *age2Δ* background. Cells were grown at 30°C in YPG and kept in logarithmic phase. Localization of Apl5 and Vps41 was analysed in the indicated strains by fluorescence microscopy. DIC image is shown in first column. **(B)** Quantification of (A). Apl6-dots co-localizing with GFP signal were counted and plotted in percent of the total number of Apl6-dots ( $n \geq 60$  cells). **(C)** AP-3 positive structures were counted and averaged per cell for all indicated strains. Box boundaries indicate 25% and 75% of the dataset, the middle line indicates the median and the small squares the mean. Whiskers correspond to 5% and 95% values while the small lines show the farthest outliers. Only relevant changes of significance are indicated ( $n \geq 60$  cells). Significance was determined with a two-tailed t-test (\*\*\*,  $p \leq 0.001$ ).

**Appendix Table S1:** Yeast strains used in this study.

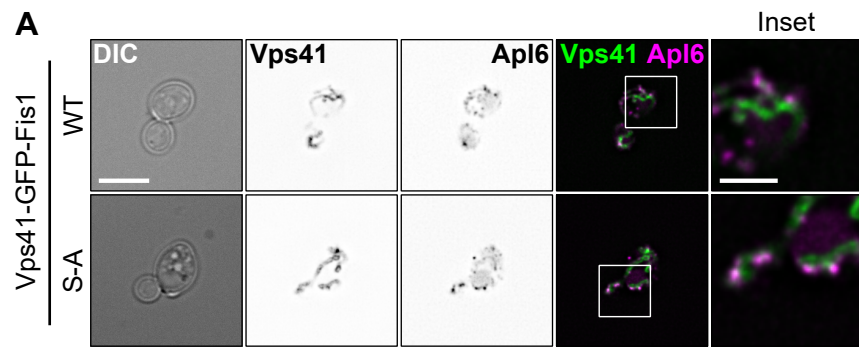

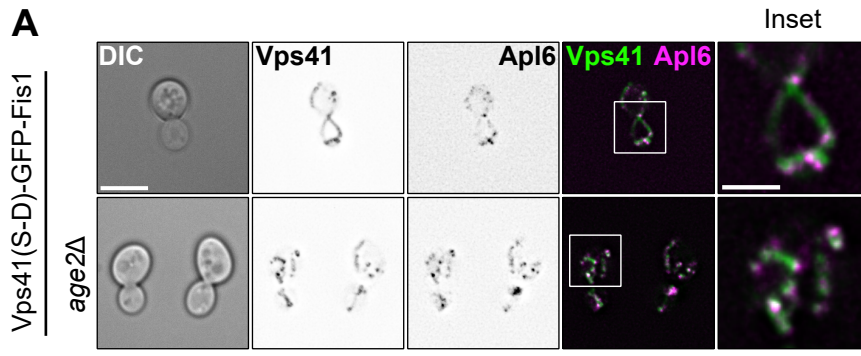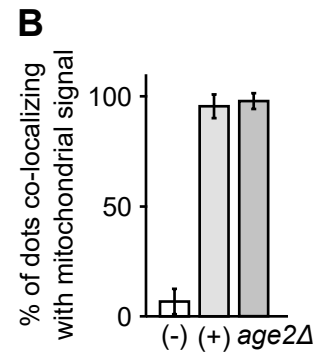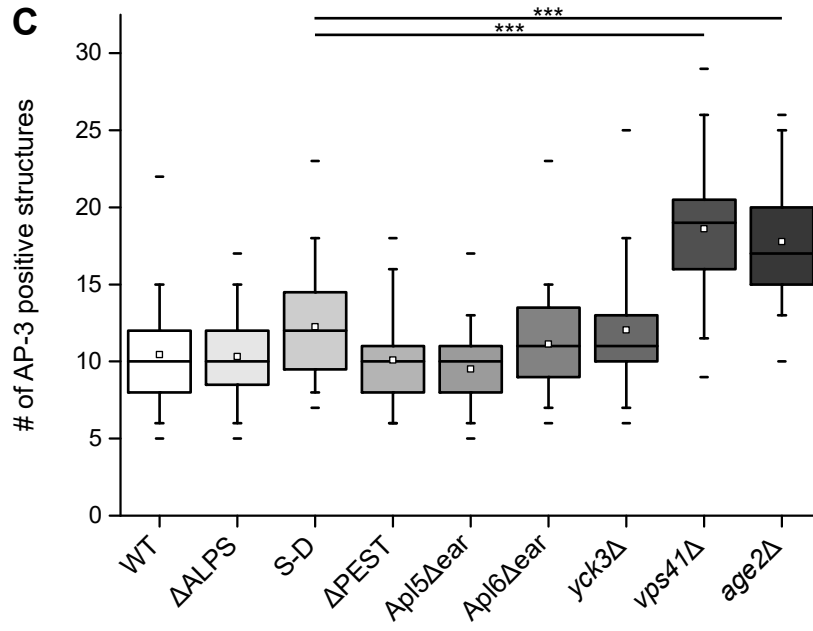

## Appendix Table S1

|          | Genotype                                                                                                                            | Reference  |
|----------|-------------------------------------------------------------------------------------------------------------------------------------|------------|
| CUY9908  | MATa <i>his3Δ1 leu2Δ0 met15Δ0 ura3Δ0 vam3Δ::kanMX vam3ts::MET15</i>                                                                 | This study |
| CUY11150 | CUY9908 <i>VPS41::mNeonGFP-hphNT1 SEC7::mCherry-natNT2</i>                                                                          | This study |
| CUY12575 | CUY9908 <i>APL5::mGFP-hphNT1 SEC7::mCherry-natNT2</i>                                                                               | This study |
| CUY12576 | CUY9908 <i>VPS41::mNeonGFP-hphNT1 APL5::mCherry-natNT2</i>                                                                          | This study |
| CUY6637  | MATalpha <i>tor1-1 fpr1::NAT PMA1-2xFKBP12::TRP1 pRS402::ADE VPS41-FRB-GFP::kanMX VPS41::URA-TEFpr APL5::mCherry-hphNT1</i>         | This study |
| CUY764   | MATa <i>his3Δ1 leu2Δ0 met15Δ0 ura3Δ0</i>                                                                                            | Euroscarf  |
| CUY9907  | MATa <i>his3Δ1 leu2Δ0 met15Δ0 ura3Δ0 clc1Δ::kanMX</i>                                                                               | Euroscarf  |
| CUY469   | MATa <i>his3Δ1 leu2Δ0 met15Δ0 ura3Δ0 yck3Δ::kanMX</i>                                                                               | Euroscarf  |
| CUY485   | MATa <i>his3Δ1 leu2Δ0 met15Δ0 ura3Δ0 apl5Δ::kanMX</i>                                                                               | Euroscarf  |
| CUY12569 | MATalpha <i>leu2-3,112 ura3-52 his3-Δ200 trp-Δ901 lys2-801 suc2-Δ9 GAL gcs1Δ::natNT2</i>                                            | This study |
| CUY12317 | MATalpha <i>leu2-3,112 ura3-52 his3-Δ200 trp-Δ901 lys2-801 suc2-Δ9 GAL age2Δ::natNT2</i>                                            | This study |
| CUY12497 | MATa <i>his3Δ1 leu2Δ0 met15Δ0 ura3Δ0 VPS41::natNT2-GAL1pr</i>                                                                       | This study |
| CUY12499 | MATa <i>his3Δ1 leu2Δ0 met15Δ0 ura3Δ0 URA3::pRS406-VPS41pr-VPS41 VPS41::kanMX-GAL1pr VPS41::GFP-Fis1-hphNT1</i>                      | This study |
| CUY12557 | MATa <i>his3Δ1 leu2Δ0 met15Δ0 ura3Δ0 URA3::pRS406-VPS41pr-VPS41 VPS41::kanMX-GAL1pr VPS41::GFP-Fis1-hphNT1 APL6::mCherry-natNT2</i> | This study |
| CUY12503 | MATa <i>his3Δ1 leu2Δ0 met15Δ0 ura3Δ0 URA3::pRS406-VPS41pr-VPS41(S-A) VPS41(S-A)::GFP-Fis1-hphNT1</i>                                | This study |
| CUY12559 | MATa <i>his3Δ1 leu2Δ0 met15Δ0 ura3Δ0 URA3::pRS406-VPS41pr-VPS41(S-A) VPS41(S-A)::GFP-Fis1-hphNT1 APL6::mCherry-kanMX</i>            |            |

## Appendix Table S1

|          |                                                                                                                                         |            |
|----------|-----------------------------------------------------------------------------------------------------------------------------------------|------------|
| CUY12614 | MATa <i>his3Δ1 leu2Δ0 met15Δ0 ura3Δ0 URA3::pRS406-VPS41pr-VPS41ΔALPS VPS41ΔALPS::GFP-Fis1-hphNT1 APL6::mCherry-kanMX</i>                | This study |
| CUY12501 | MATa <i>his3Δ1 leu2Δ0 met15Δ0 ura3Δ0 URA3::pRS406-VPS41pr-VPS41ΔPEST VPS41ΔPEST::GFP-Fis1-hphNT1</i>                                    | This study |
| CUY12558 | MATa <i>his3Δ1 leu2Δ0 met15Δ0 ura3Δ0 URA3::pRS406-VPS41pr-VPS41ΔPEST VPS41ΔPEST::GFP-Fis1-hphNT1 APL6::mCherry-kanMX</i>                | This study |
| CUY12505 | MATa <i>his3Δ1 leu2Δ0 met15Δ0 ura3Δ0 URA3::pRS406-VPS41pr-VPS41(S-D) VPS41(S-D)::GFP-Fis1-hphNT1</i>                                    | This study |
| CUY12560 | MATa <i>his3Δ1 leu2Δ0 met15Δ0 ura3Δ0 URA3::pRS406-VPS41pr-VPS41(S-D) VPS41(S-D)::GFP-Fis1-hphNT1 APL6::mCherry-kanMX</i>                | This study |
| CUY12564 | MATa <i>his3Δ1 leu2Δ0 met15Δ0 ura3Δ0 URA3::pRS406-VPS41pr-VPS41(S-D) VPS41(S-D)::GFP-Fis1-hphNT1 APL5::ΔEAR-mCherry-natNT1</i>          | This study |
| CUY12565 | MATa <i>his3Δ1 leu2Δ0 met15Δ0 ura3Δ0 URA3::pRS406-VPS41pr-VPS41(S-D) VPS41(S-D)::GFP-Fis1-hphNT1 APL6::ΔEAR-mCherry-natNT1</i>          | This study |
| CUY12566 | MATa <i>his3Δ1 leu2Δ0 met15Δ0 ura3Δ0 URA3::pRS406-VPS41pr-VPS41(S-D) VPS41(S-D)::GFP-Fis1-hphNT1 age2Δ::kanMX APL6::mCherry-natNT2</i>  | This study |
| CUY12567 | MATa <i>his3Δ1 leu2Δ0 met15Δ0 ura3Δ0 URA3::pRS406-VPS41pr-VPS41(S-D) VPS41(S-D)::GFP-Fis1-hphNT1 yck3Δ::kanMX APL6::mCherry-natNT2</i>  | This study |
| CUY12568 | MATa <i>his3Δ1 leu2Δ0 met15Δ0 ura3Δ0 URA3::pRS406-VPS41pr-VPS41(S-D) VPS41(S-D)::GFP-Fis1-hphNT1 vps41Δ::kanMX APL6::mCherry-natNT2</i> | This study |
| CUY12609 | MATalpha <i>leu2-3,112 ura3-52 his3-Δ200 trp-Δ901 lys2-801 suc2-Δ9 GAL APL5::mGFP-hphNT1</i>                                            | This study |
| CUY12572 | MATalpha <i>leu2-3,112 ura3-52 his3-Δ200 trp-Δ901 lys2-801 suc2-Δ9 GAL age2Δ::natNT2 APL5::mGFP-hphNT1</i>                              | This study |
| CUY12573 | MATalpha <i>leu2-3,112 ura3-52 his3-Δ200 trp-Δ901 lys2-801 suc2-Δ9 GAL gcs1Δ::natNT2 APL5::mGFP-hphNT1</i>                              | This study |
| CUY12610 | MATalpha <i>leu2-3,112 ura3-52 his3-Δ200 trp-Δ901 lys2-801 suc2-Δ9 GAL APL5::mGFP-hphNT1 SEC7::mCherry-natNT2</i>                       | This study |

## Appendix Table S1

|          |                                                                                                                                                    |            |
|----------|----------------------------------------------------------------------------------------------------------------------------------------------------|------------|
| CUY12611 | MATalpha <i>leu2-3,112 ura3-52 his3-Δ200 trp-Δ901 lys2-801 suc2-Δ9 GAL age2Δ::natNT2 APL5::mGFP-hphNT1 SEC7::mCherry-natNT2</i>                    | This study |
| CUY12318 | MATa <i>his3Δ1 leu2Δ0 met15Δ0 ura3Δ0 APL5::TurboID-V5-kanMX4</i>                                                                                   | This study |
| CUY12312 | MATa <i>his3Δ1 leu2Δ0 met15Δ0 ura3Δ0 URA3::pRS406-VPS41pr-VPS41(S-D) VPS41(S-D)::GFP-Fis1-hphNT1 APL5::TurboID-V5-kanMX4</i>                       | This study |
| CUY12667 | MATalpha <i>leu2-3,112 ura3-52 his3-Δ200 trp-Δ901 lys2-801 suc2-Δ9 GAL age2Δ::natNT2 URA3::pRS406-AGE2pr-AGE2-AGE2term</i>                         | This study |
| CUY12668 | MATalpha <i>leu2-3,112 ura3-52 his3-Δ200 trp-Δ901 lys2-801 suc2-Δ9 GAL age2Δ::natNT2 URA3::pRS406-AGE2pr-AGE2-AGE2term APL5::mGFP-hphNT1</i>       | This study |
| CUY12669 | MATalpha <i>leu2-3,112 ura3-52 his3-Δ200 trp-Δ901 lys2-801 suc2-Δ9 GAL age2Δ::natNT2 URA3::pRS406-AGE2pr-AGE2(R52K)-AGE2term</i>                   | This study |
| CUY12670 | MATalpha <i>leu2-3,112 ura3-52 his3-Δ200 trp-Δ901 lys2-801 suc2-Δ9 GAL age2Δ::natNT2 URA3::pRS406-AGE2pr-AGE2(R52K)-AGE2term APL5::mGFP-hphNT1</i> | This study |
| CUY12671 | MATalpha <i>leu2-3,112 ura3-52 his3-Δ200 trp-Δ901 lys2-801 suc2-Δ9 GAL gcs1Δ::natNT2 URA3::pRS406-GCS1pr-GCS1-GCS1term</i>                         | This study |
| CUY12672 | MATalpha <i>leu2-3,112 ura3-52 his3-Δ200 trp-Δ901 lys2-801 suc2-Δ9 GAL gcs1Δ::natNT2 URA3::pRS406-GCS1pr-GCS1-GCS1term APL5::mGFP-hphNT1</i>       | This study |
| CUY12673 | MATalpha <i>leu2-3,112 ura3-52 his3-Δ200 trp-Δ901 lys2-801 suc2-Δ9 GAL gcs1Δ::natNT2 URA3::pRS406-GCS1pr-GCS1(R54K)-GCS1term</i>                   | This study |
| CUY12674 | MATalpha <i>leu2-3,112 ura3-52 his3-Δ200 trp-Δ901 lys2-801 suc2-Δ9 GAL gcs1Δ::natNT2 URA3::pRS406-GCS1pr-GCS1(R54K)-GCS1term APL5::mGFP-hphNT1</i> | This study |
| CUY12689 | MATalpha <i>leu2-3,112 ura3-52 his3-Δ200 trp-Δ901 lys2-801 suc2-Δ9 GAL GCS1::kanMX-TEFpr</i>                                                       | This study |
| CUY12690 | MATalpha <i>leu2-3,112 ura3-52 his3-Δ200 trp-Δ901 lys2-801 suc2-Δ9 GAL GCS1::kanMX-TEFpr APL5::mGFP-hphNT1</i>                                     | This study |
| CUY12691 | MATalpha <i>leu2-3,112 ura3-52 his3-Δ200 trp-Δ901 lys2-801 suc2-Δ9 GAL AGE2::kanMX-TEFpr</i>                                                       | This study |

## Appendix Table S1

|          |                                                                                                                |            |
|----------|----------------------------------------------------------------------------------------------------------------|------------|
| CUY12692 | MATalpha <i>leu2-3,112 ura3-52 his3-Δ200 trp-Δ901 lys2-801 suc2-Δ9 GAL AGE2::kanMX-TEFpr APL5::mGFP-hphNT1</i> | This study |
|----------|----------------------------------------------------------------------------------------------------------------|------------|
